# Supplementary material for: Response Prediction to Concurrent Chemoradiotherapy in Esophageal Squamous Cell Carcinoma Using Delta-Radiomics Based on Sequential Whole-Tumor ADC Map
Source: Front Oncol. 2022 Mar 15;12:787489. doi: 10.3389/fonc.2022.787489 (PMC8982070; doi:10.3389/fonc.2022.787489)
Supplement: Supplementary file 3 [file Table_2.xlsx]

## Sheet: Sheet1
Supplementary Table 2: Clinical characteristics of five extra patients with ESCC
name	sex	age	T-stage	N stage	M-stage	location	treatment plan
no.1	male	70	3	1	0	Upper thoracic	concurrent chemoradiotherapy
no.2	female	66	4	1	0	Middle thoracic	concurrent chemoradiotherapy
no.3	male	62	3	2	0	Lower thoracic	concurrent chemoradiotherapy
no.4	male	50	3	0	0	Middle thoracic	concurrent chemoradiotherapy
no.5	female	62	3	1	0	Upper thoracic	concurrent chemoradiotherapy
