# Supplementary material for: Response Prediction to Concurrent Chemoradiotherapy in Esophageal Squamous Cell Carcinoma Using Delta-Radiomics Based on Sequential Whole-Tumor ADC Map
Source: Front Oncol. 2022 Mar 15;12:787489. doi: 10.3389/fonc.2022.787489 (PMC8982070; doi:10.3389/fonc.2022.787489)
Supplement: Supplementary file 7 [file Table_6.xlsx]

## Sheet: bland-altman
Supplementary Table 6: Radiomics features after selected in the training set by Bland-Altman method
Image type	Feature Class	Feature Name
original	shape	Maximum3DDiameter
original	shape	MajorAxisLength
original	shape	Sphericity
original	shape	LeastAxisLength
original	shape	SurfaceVolumeRatio
original	shape	Maximum2DDiameterSlice
original	shape	SurfaceArea
original	shape	MinorAxisLength
original	shape	Maximum2DDiameterColumn
original	shape	Maximum2DDiameterRow
original	gldm	DependenceEntropy
original	gldm	GrayLevelNonUniformity
original	gldm	SmallDependenceEmphasis
original	gldm	DependenceNonUniformityNormalized
original	gldm	LargeDependenceEmphasis
original	glcm	Idmn
original	glcm	Idn
original	glcm	Idm
original	glcm	Id
original	firstorder	InterquartileRange
original	firstorder	Uniformity
original	firstorder	RobustMeanAbsoluteDeviation
original	firstorder	MeanAbsoluteDeviation
original	firstorder	90Percentile
original	glrlm	GrayLevelNonUniformityNormalized
original	glrlm	RunVariance
original	glrlm	GrayLevelNonUniformity
original	glrlm	LongRunEmphasis
original	glrlm	ShortRunEmphasis
original	glrlm	RunPercentage
original	glrlm	RunEntropy
original	glrlm	RunLengthNonUniformityNormalized
wavelet-HLL	gldm	DependenceEntropy
wavelet-HLL	gldm	GrayLevelNonUniformity
wavelet-HLL	gldm	SmallDependenceEmphasis
wavelet-HLL	gldm	DependenceNonUniformityNormalized
wavelet-HLL	gldm	LargeDependenceEmphasis
wavelet-HLL	gldm	DependenceVariance
wavelet-HLL	glcm	JointEntropy
wavelet-HLL	glcm	MaximumProbability
wavelet-HLL	glcm	Idmn
wavelet-HLL	glcm	JointEnergy
wavelet-HLL	glcm	DifferenceEntropy
wavelet-HLL	glcm	InverseVariance
wavelet-HLL	glcm	Idn
wavelet-HLL	glcm	Idm
wavelet-HLL	glcm	SumEntropy
wavelet-HLL	glcm	Imc2
wavelet-HLL	glcm	Imc1
wavelet-HLL	glcm	Id
wavelet-HLL	firstorder	InterquartileRange
wavelet-HLL	firstorder	Uniformity
wavelet-HLL	firstorder	RobustMeanAbsoluteDeviation
wavelet-HLL	firstorder	90Percentile
wavelet-HLL	firstorder	Entropy
wavelet-HLL	glrlm	GrayLevelNonUniformityNormalized
wavelet-HLL	glrlm	RunVariance
wavelet-HLL	glrlm	GrayLevelNonUniformity
wavelet-HLL	glrlm	LongRunEmphasis
wavelet-HLL	glrlm	ShortRunEmphasis
wavelet-HLL	glrlm	RunPercentage
wavelet-HLL	glrlm	RunEntropy
wavelet-HLL	glrlm	RunLengthNonUniformityNormalized
wavelet-HLL	glszm	ZoneEntropy
wavelet-LHL	gldm	DependenceEntropy
wavelet-LHL	gldm	GrayLevelNonUniformity
wavelet-LHL	gldm	SmallDependenceEmphasis
wavelet-LHL	gldm	DependenceNonUniformityNormalized
wavelet-LHL	gldm	LargeDependenceEmphasis
wavelet-LHL	gldm	DependenceVariance
wavelet-LHL	glcm	JointEntropy
wavelet-LHL	glcm	MaximumProbability
wavelet-LHL	glcm	Idmn
wavelet-LHL	glcm	JointEnergy
wavelet-LHL	glcm	DifferenceEntropy
wavelet-LHL	glcm	InverseVariance
wavelet-LHL	glcm	Idn
wavelet-LHL	glcm	Idm
wavelet-LHL	glcm	SumEntropy
wavelet-LHL	firstorder	RobustMeanAbsoluteDeviation
wavelet-LHL	firstorder	MeanAbsoluteDeviation
wavelet-LHL	firstorder	90Percentile
wavelet-LHL	firstorder	Entropy
wavelet-LHL	glrlm	GrayLevelNonUniformityNormalized
wavelet-LHL	glrlm	RunVariance
wavelet-LHL	glrlm	LongRunEmphasis
wavelet-LHL	glrlm	ShortRunEmphasis
wavelet-LHL	glrlm	RunPercentage
wavelet-LHL	glrlm	RunEntropy
wavelet-LHL	glrlm	RunLengthNonUniformityNormalized
wavelet-LHL	glszm	ZoneEntropy
wavelet-LHH	gldm	DependenceEntropy
wavelet-LHH	gldm	DependenceNonUniformityNormalized
wavelet-LHH	gldm	LargeDependenceEmphasis
wavelet-LHH	gldm	DependenceVariance
wavelet-LHH	glcm	Idn
wavelet-LHH	glcm	Idm
wavelet-LHH	glcm	SumEntropy
wavelet-LHH	firstorder	RobustMeanAbsoluteDeviation
wavelet-LHH	firstorder	Entropy
wavelet-LHH	firstorder	10Percentile
wavelet-LHH	glrlm	ShortRunEmphasis
wavelet-LHH	glrlm	RunPercentage
wavelet-LHH	glrlm	RunEntropy
wavelet-LHH	glrlm	RunLengthNonUniformityNormalized
wavelet-LLH	gldm	DependenceEntropy
wavelet-LLH	gldm	GrayLevelNonUniformity
wavelet-LLH	gldm	DependenceNonUniformityNormalized
wavelet-LLH	gldm	LargeDependenceEmphasis
wavelet-LLH	gldm	DependenceVariance
wavelet-LLH	glcm	JointEntropy
wavelet-LLH	glcm	MaximumProbability
wavelet-LLH	glcm	Idmn
wavelet-LLH	glcm	JointEnergy
wavelet-LLH	glcm	DifferenceEntropy
wavelet-LLH	glcm	InverseVariance
wavelet-LLH	glcm	Idn
wavelet-LLH	glcm	Idm
wavelet-LLH	firstorder	InterquartileRange
wavelet-LLH	firstorder	Uniformity
wavelet-LLH	firstorder	RobustMeanAbsoluteDeviation
wavelet-LLH	firstorder	Entropy
wavelet-LLH	glrlm	GrayLevelNonUniformityNormalized
wavelet-LLH	glrlm	RunVariance
wavelet-LLH	glrlm	LongRunEmphasis
wavelet-LLH	glrlm	ShortRunEmphasis
wavelet-LLH	glrlm	RunPercentage
wavelet-LLH	glrlm	RunEntropy
wavelet-LLH	glrlm	RunLengthNonUniformityNormalized
wavelet-LLH	glszm	ZoneEntropy
wavelet-HLH	gldm	DependenceEntropy
wavelet-HLH	gldm	DependenceNonUniformityNormalized
wavelet-HLH	gldm	LargeDependenceEmphasis
wavelet-HLH	gldm	DependenceVariance
wavelet-HLH	glcm	JointEntropy
wavelet-HLH	glcm	MaximumProbability
wavelet-HLH	glcm	Idmn
wavelet-HLH	glcm	JointEnergy
wavelet-HLH	glcm	DifferenceEntropy
wavelet-HLH	glcm	InverseVariance
wavelet-HLH	glcm	Idn
wavelet-HLH	glcm	Idm
wavelet-HLH	glcm	SumEntropy
wavelet-HLH	glcm	Imc2
wavelet-HLH	glcm	Imc1
wavelet-HLH	glcm	Id
wavelet-HLH	firstorder	InterquartileRange
wavelet-HLH	firstorder	Uniformity
wavelet-HLH	firstorder	RobustMeanAbsoluteDeviation
wavelet-HLH	firstorder	Entropy
wavelet-HLH	firstorder	10Percentile
wavelet-HLH	glrlm	GrayLevelNonUniformityNormalized
wavelet-HLH	glrlm	RunVariance
wavelet-HLH	glrlm	LongRunEmphasis
wavelet-HLH	glrlm	ShortRunEmphasis
wavelet-HLH	glrlm	RunPercentage
wavelet-HLH	glrlm	RunEntropy
wavelet-HLH	glrlm	RunLengthNonUniformityNormalized
wavelet-HHH	gldm	GrayLevelVariance
wavelet-HHH	gldm	DependenceEntropy
wavelet-HHH	gldm	DependenceNonUniformityNormalized
wavelet-HHH	glcm	SumSquares
wavelet-HHH	glcm	Imc2
wavelet-HHH	glcm	Imc1
wavelet-HHH	glcm	DifferenceAverage
wavelet-HHH	glcm	Id
wavelet-HHH	glcm	ClusterTendency
wavelet-HHH	firstorder	InterquartileRange
wavelet-HHH	firstorder	Uniformity
wavelet-HHH	firstorder	RobustMeanAbsoluteDeviation
wavelet-HHH	firstorder	90Percentile
wavelet-HHH	firstorder	Entropy
wavelet-HHH	glrlm	GrayLevelVariance
wavelet-HHH	glrlm	GrayLevelNonUniformityNormalized
wavelet-HHH	glrlm	RunVariance
wavelet-HHH	glrlm	LongRunEmphasis
wavelet-HHH	glrlm	ShortRunEmphasis
wavelet-HHL	gldm	DependenceNonUniformityNormalized
wavelet-HHL	gldm	LargeDependenceEmphasis
wavelet-HHL	gldm	DependenceVariance
wavelet-HHL	glcm	JointEntropy
wavelet-HHL	glcm	MaximumProbability
wavelet-HHL	glcm	Idmn
wavelet-HHL	glcm	JointEnergy
wavelet-HHL	glcm	DifferenceEntropy
wavelet-HHL	glcm	InverseVariance
wavelet-HHL	glcm	Idn
wavelet-HHL	glcm	Idm
wavelet-HHL	glcm	SumEntropy
wavelet-HHL	glcm	Imc2
wavelet-HHL	glcm	Imc1
wavelet-HHL	glcm	DifferenceAverage
wavelet-HHL	glcm	Id
wavelet-HHL	firstorder	InterquartileRange
wavelet-HHL	firstorder	Uniformity
wavelet-HHL	firstorder	RobustMeanAbsoluteDeviation
wavelet-HHL	glrlm	GrayLevelNonUniformity
wavelet-HHL	glrlm	LongRunEmphasis
wavelet-HHL	glrlm	ShortRunEmphasis
wavelet-HHL	glrlm	RunPercentage
wavelet-HHL	glrlm	RunEntropy
wavelet-HHL	glrlm	RunLengthNonUniformityNormalized
wavelet-LLL	gldm	DependenceEntropy
wavelet-LLL	gldm	GrayLevelNonUniformity
wavelet-LLL	gldm	SmallDependenceEmphasis
wavelet-LLL	gldm	DependenceNonUniformityNormalized
wavelet-LLL	gldm	LargeDependenceEmphasis
wavelet-LLL	gldm	DependenceVariance
wavelet-LLL	glcm	Idmn
wavelet-LLL	glcm	Idn
wavelet-LLL	glcm	Idm
wavelet-LLL	glcm	Id
wavelet-LLL	firstorder	InterquartileRange
wavelet-LLL	firstorder	Uniformity
wavelet-LLL	firstorder	RobustMeanAbsoluteDeviation
wavelet-LLL	firstorder	MeanAbsoluteDeviation
wavelet-LLL	glrlm	GrayLevelNonUniformityNormalized
wavelet-LLL	glrlm	RunVariance
wavelet-LLL	glrlm	GrayLevelNonUniformity
wavelet-LLL	glrlm	LongRunEmphasis
wavelet-LLL	glrlm	ShortRunEmphasis
wavelet-LLL	glrlm	RunPercentage
wavelet-LLL	glrlm	RunEntropy
wavelet-LLL	glrlm	RunLengthNonUniformityNormalized
