# Supplementary material for: Response Prediction to Concurrent Chemoradiotherapy in Esophageal Squamous Cell Carcinoma Using Delta-Radiomics Based on Sequential Whole-Tumor ADC Map
Source: Front Oncol. 2022 Mar 15;12:787489. doi: 10.3389/fonc.2022.787489 (PMC8982070; doi:10.3389/fonc.2022.787489)
Supplement: Supplementary file 8 [file Table_7.xlsx]

## Sheet: Sheet1
Supplementary Table 7: The 30 radiomics features finally analyzed in the study after selection
Image type	Feature Class	Feature Name		Definition
original	gldm	Dependence Entropy		Dependence Entropy specifies the uncertainty/randomness in the image values. It measures the average amount of information required to encode the image values in a Gray Level Dependence Matrix.
original	glcm	Idm	Inverse Difference Moment (IDM)	IDM is a measure of the local homogeneity of an image. IDM weights are the inverse of the Contrast weights
original	glcm	Id	Inverse Difference (ID)	ID is another measure of the local homogeneity of an image. With more uniform gray levels, the denominator will remain low, resulting in a higher overall value
original	firstorder	Uniformity		Uniformity is a measure of the sum of the squares of each intensity value. This is a measure of the homogeneity of the image array, where a greater uniformity implies a greater homogeneity or a smaller range of discrete intensity values.
original	glrlm	Gray Level NonUniformity Normalized		GLNN measures the similarity of gray-level intensity values in the image, where a lower GLNN value correlates with a greater similarity in intensity values. This is the normalized version of the GLN formula.
original	glrlm	Run Entropy		RE measures the uncertainty/randomness in the distribution of run lengths and gray levels. A higher value indicates more heterogeneity in the texture patterns.
original	glrlm	Run Length NonUniformity Normalized		RLNN measures the similarity of run lengths throughout the image, with a lower value indicating more homogeneity among run lengths in the image. This is the normalized version of the RLN formula.
wavelet-HLL	glcm	Maximum Probability		Maximum Probability is occurrences of the most predominant pair of neighboring intensity values.
wavelet-HLL	glcm	Joint Energy		Joint entropy is a measure of the randomness/variability in neighborhood intensity values.
wavelet-HLL	glcm	Sum Entropy		Sum Entropy is a sum of neighborhood intensity value differences.
wavelet-HLL	glcm	Imc2	Informational Measure of Correlation (IMC) 2	IMC2 also assesses the correlation between the probability distributions of ii and jj (quantifying the complexity of the texture).
wavelet-HLL	firstorder	Uniformity
wavelet-HLL	glrlm	Gray Level NonUniformity Normalized
wavelet-HLL	glrlm	Long Run Emphasis		LRE is a measure of the distribution of long run lengths, with a greater value indicative of longer run lengths and more coarse structural textures.
wavelet-HLL	glrlm	Short Run Emphasis		SRE is a measure of the distribution of short run lengths, with a greater value indicative of shorter run lengths and more fine textural textures.
wavelet-HLL	glrlm	Run Entropy
wavelet-HLL	glszm	Zone Entropy		ZE measures the uncertainty/randomness in the distribution of zone sizes and gray levels. A higher value indicates more heterogeneneity in the texture patterns.
wavelet-LHL	gldm	Dependence Entropy
wavelet-LHL	glcm	Joint Energy
wavelet-LHL	glszm	Zone Entropy
wavelet-LLH	glcm	Idmn	Inverse Difference Moment Normalized (IDMN)	IDMN (inverse difference moment normalized) is a measure of the local homogeneity of an image. IDMN weights are the inverse of the Contrast weights (decreasing exponentially from the diagonal i=ji=j in the GLCM). Unlike Homogeneity2, IDMN normalizes the square of the difference between neighboring intensity values by dividing over the square of the total number of discrete intensity values.
wavelet-LLH	glszm	Zone Entropy
wavelet-HHL	glcm	Idmn
wavelet-LLL	gldm	Dependence Entropy
wavelet-LLL	gldm	Small Dependence Emphasis		A measure of the distribution of small dependencies, with a greater value indicative of smaller dependence and less homogeneous textures.
wavelet-LLL	gldm	Large Dependence Emphasis		A measure of the distribution of large dependencies, with a greater value indicative of larger dependence and more homogeneous textures.
wavelet-LLL	glcm	Id
wavelet-LLL	firstorder	Mean Absolute Deviation		Mean Absolute Deviation is the mean distance of all intensity values from the Mean Value of the image array.
wavelet-LLL	glrlm	Run Entropy
wavelet-LLL	glrlm	Run Length NonUniformity Normalized
